# Supplementary material for: Generation of restriction endonucleases barcode map to trace SARS-CoV-2 origin and evolution
Source: PubMed Central journal article supplement (PMC8175367; doi:10.1038/s41598-021-91264-6), 2021-06-03
Supplement: 41598_2021_91264_MOESM1_ESM.pdf [file 41598_2021_91264_MOESM1_ESM.pdf]

## **Supplementary Information**

### **Generation of restriction endonucleases barcoding map to trace SARSars-CoV-2 origin and evolution.**

Federico Colombo<sup>1†</sup>, Elisa Corsiero<sup>1†</sup>, Myles J. Lewis<sup>1</sup>, and Costantino Pitzalis<sup>1</sup>

<sup>1</sup>Centre for Experimental Medicine & Rheumatology, William Harvey Research Institute, Barts and The London School of Medicine & Dentistry, Queen Mary University of London, John Vane Science Centre, Charterhouse Square

† Corresponding Authors: Federico Colombo and Elisa Corsiero

Centre for Experimental Medicine & Rheumatology, William Harvey Research Institute, Barts and The London School of Medicine & Dentistry, Queen Mary University of London, John Vane Science Centre, Charterhouse Square

London EC1M 6BQ, UK

Tel: +44 (0)2078828193

Fax: +44 (0)2078826104

Email: [f.colombo@qmul.ac.uk](mailto:f.colombo@qmul.ac.uk); [e.corsiero@qmul.ac.uk](mailto:e.corsiero@qmul.ac.uk)

The authors declare that they have no conflict of interest.

## Supplementary Figure Legends

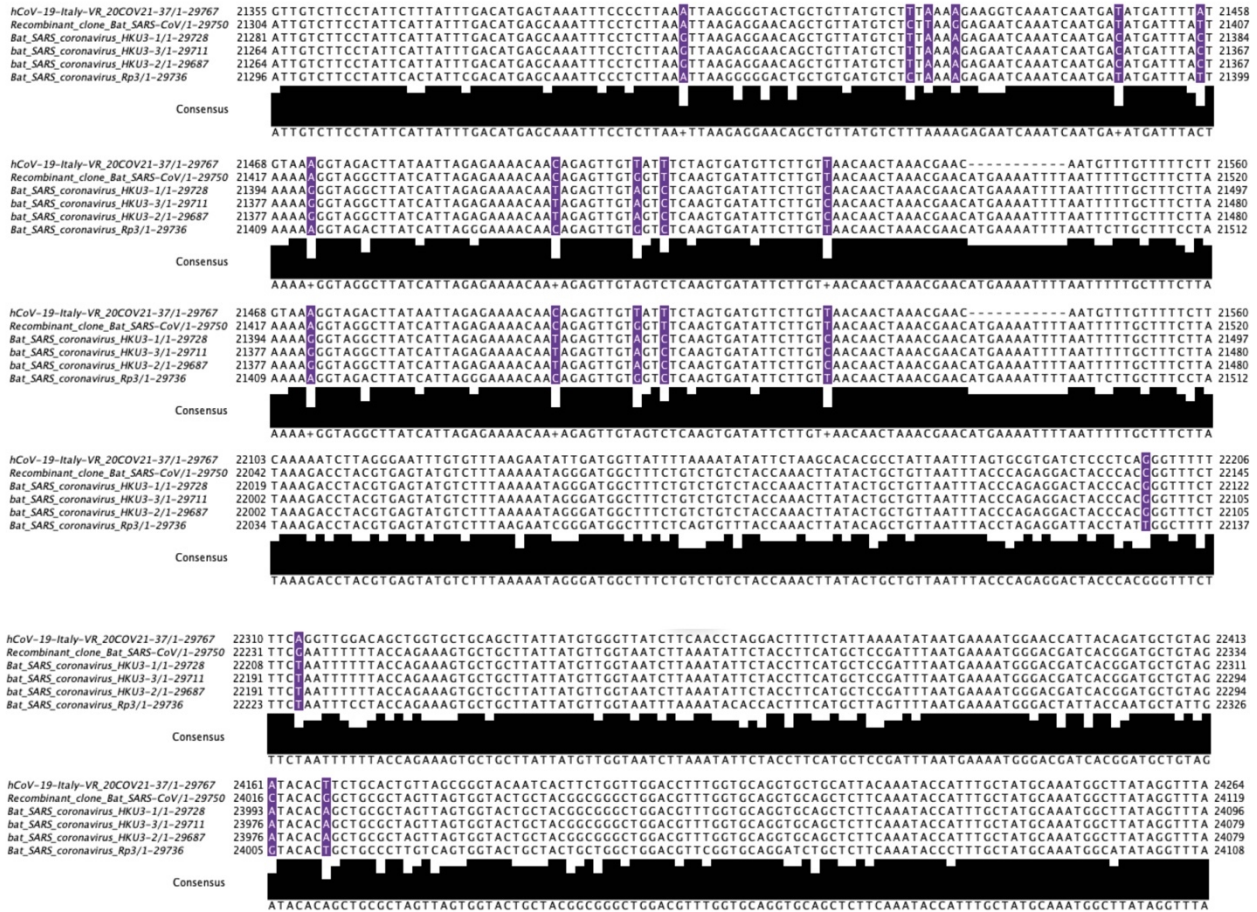

**Figure S1. Specific markers used to build the full-length Bat-SCoV infectious clone.**

Full size of the Figure 2B that highlights in violet specific markers used to build a recombinant spike between the Bat-SCoVs genomes HKU3 and RP3. In the hCoV-19-Italy-VR sequence most of these markers' sites are not present, while are similar to the wild type virus HKU3 and RP3.

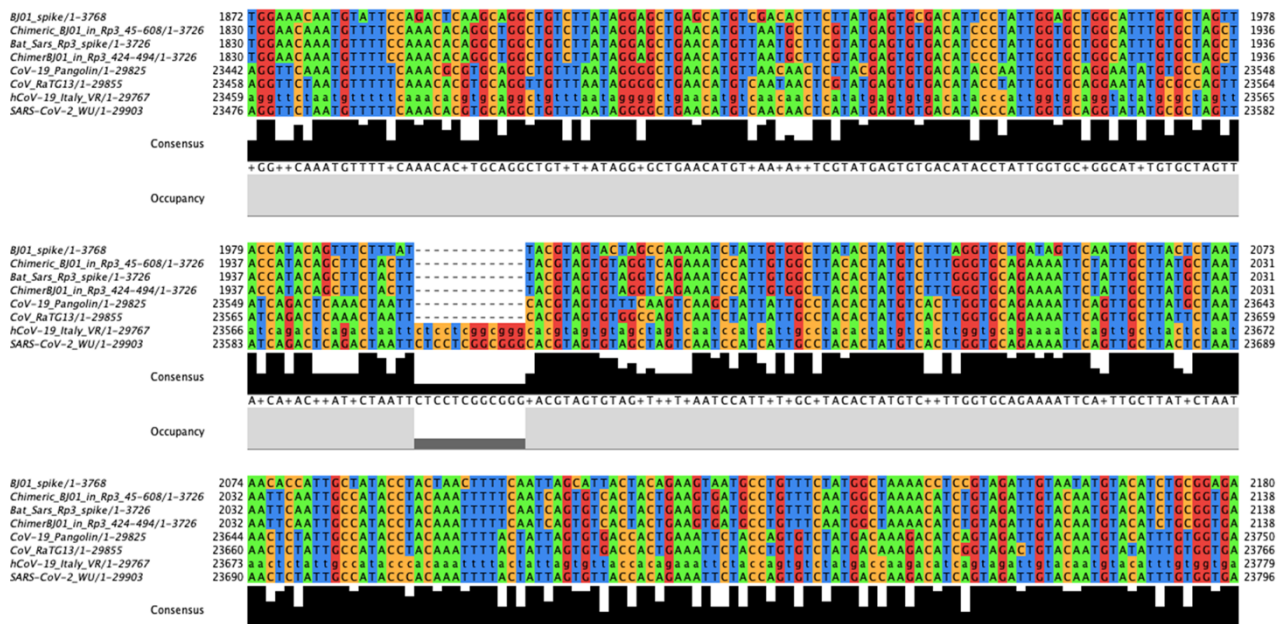

**Figure S2. Polybasic cleavage site in two chimeric spikes from BJ01 and RP3.**

Multiple sequence alignment performed with ClustalW and visualised with JalView show the differences in the polybasic cleavage site between chimeric Spikes (BJ01 and RP3) generated in the laboratory (line 2 and 4) compared with other SARS-CoV sequences.



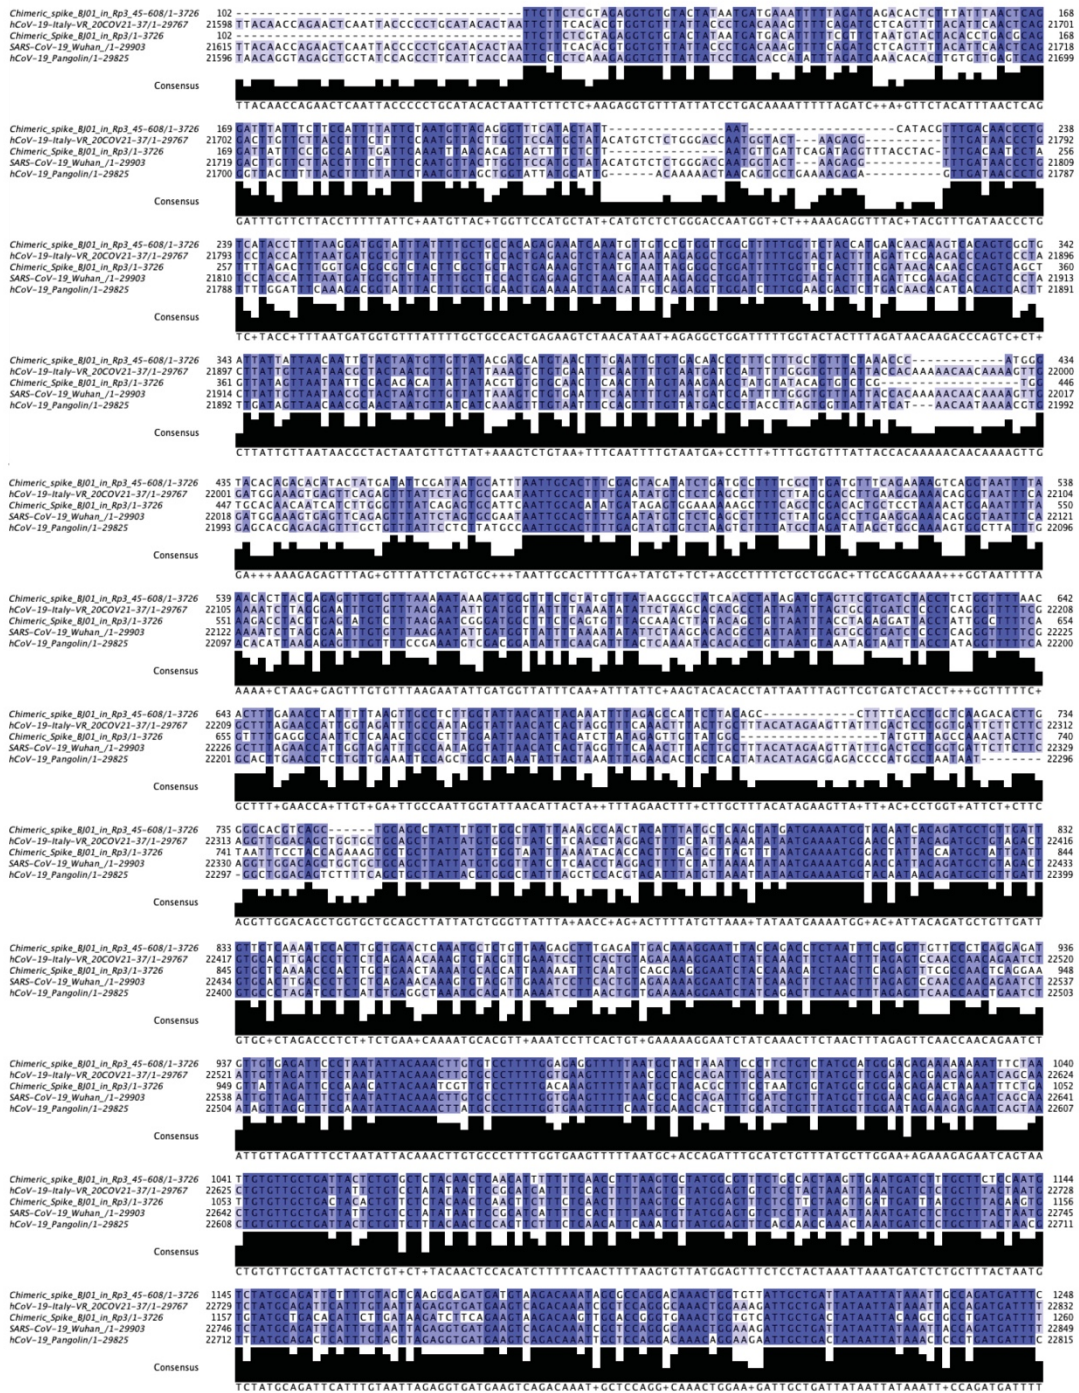

**Figure S3. Full alignment between chimeric BJ01-RP3 and other Sars-CoV-2.**

Alignment of two chimeric spikes (two different BJ01 aminoacidic sequence (424-494; 45-608) into the RP3) with the SARS-CoV 2 isolated in Italy and Wuhan and from the Pangolin.

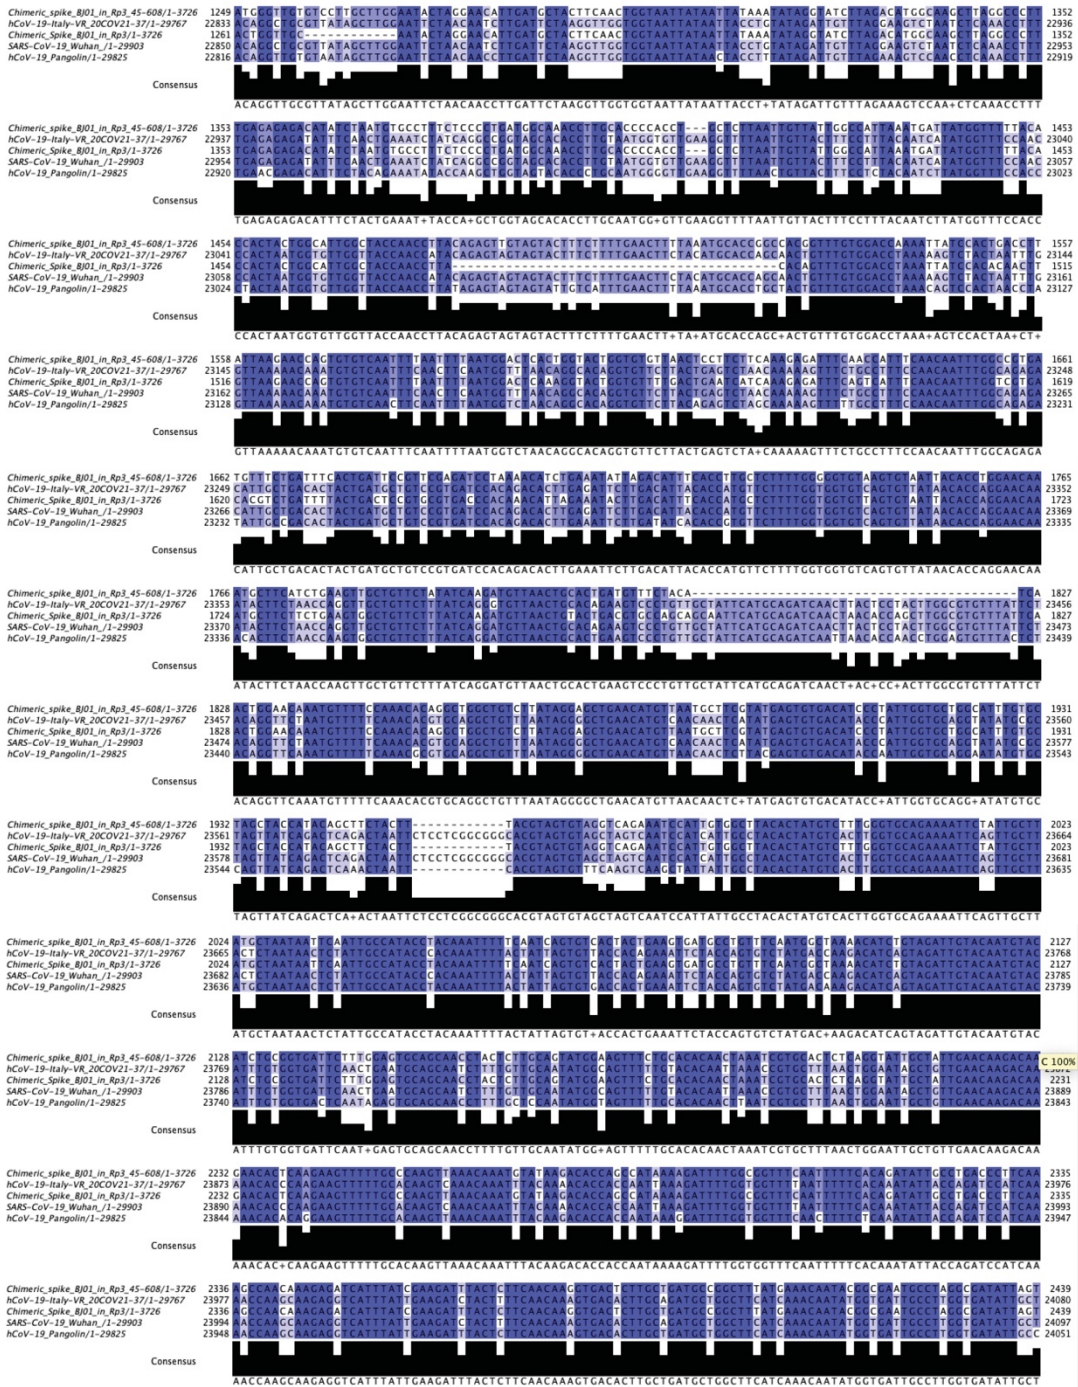

**Figure S4. Full alignment between chimeric BJ01-RP3 and other Sars-CoV-2.**

Alignment of two chimeric spikes (two different BJ01 aminoacidic sequence (424-494; 45-608) into the RP3) with the SARS-CoV 2 isolated in Italy and Wuhan and from the Pangolin.



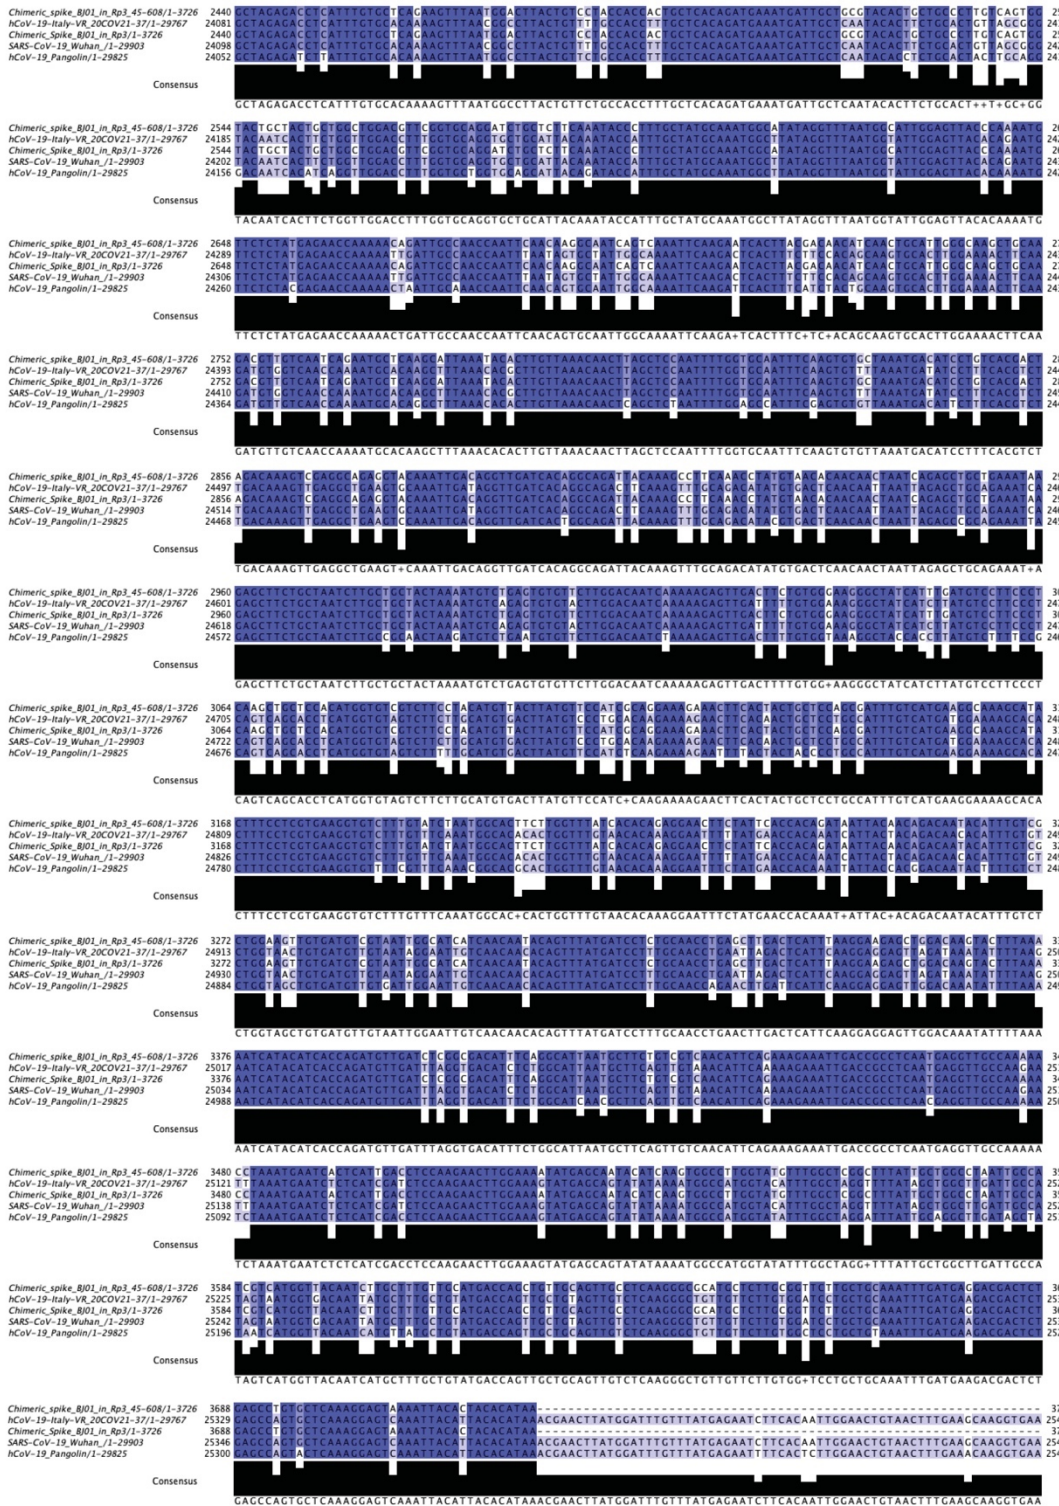

**Figure S5. Full alignment between chimeric BJ01-RP3 and two different BJ01 aminoacidic sequence (424-494; 45-608) into the RP3) with the SARS-CoV 2 isolated in Italy and Wuhan and from the Pangolin.**

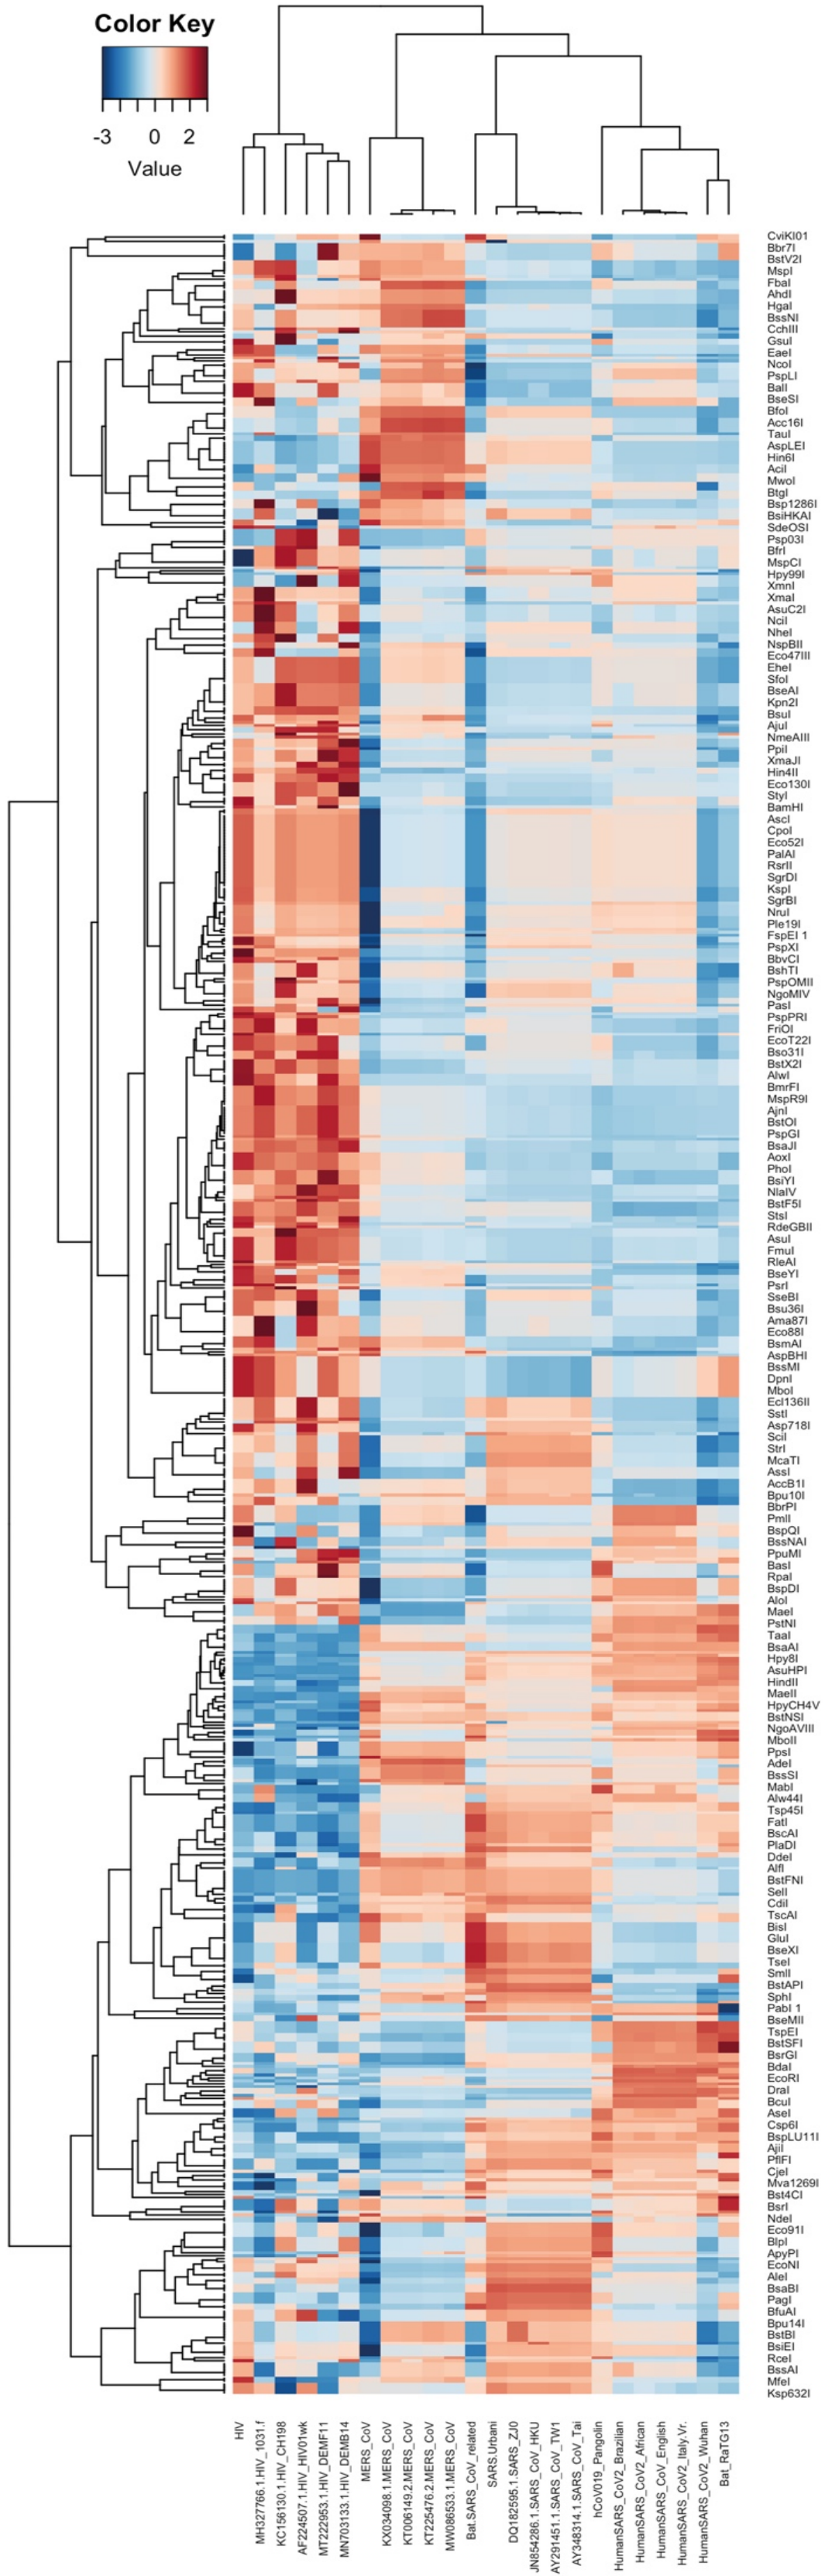

**Figure S6. RS barcodes map in high resolution and full size.** This image is the same image of the Figure 2A and can be usefully to read the labels of the RSs reported on the right of the image.



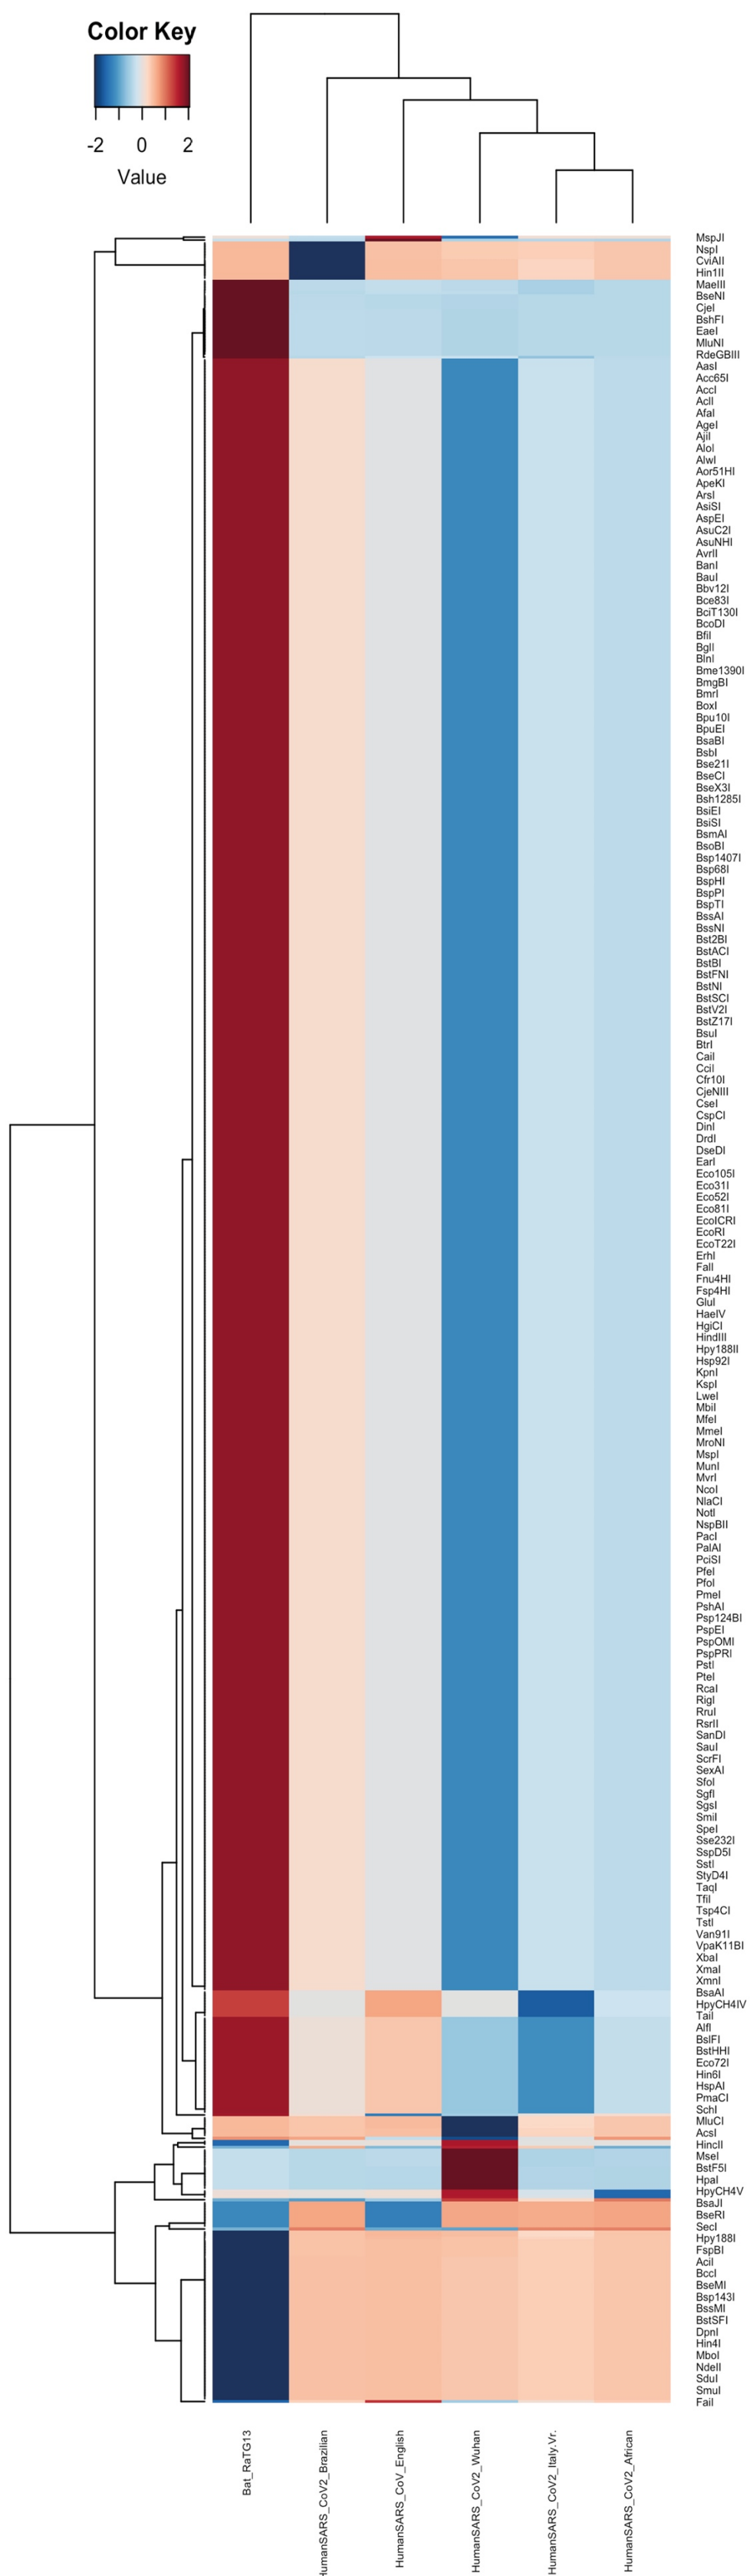

**Figure S7. 300 bp RSs barcode map in high resolution and full size. 300 bp.** This image is the same image of the Figure 2B and can be usefully to read the labels of the RSs reported on the right of the image.



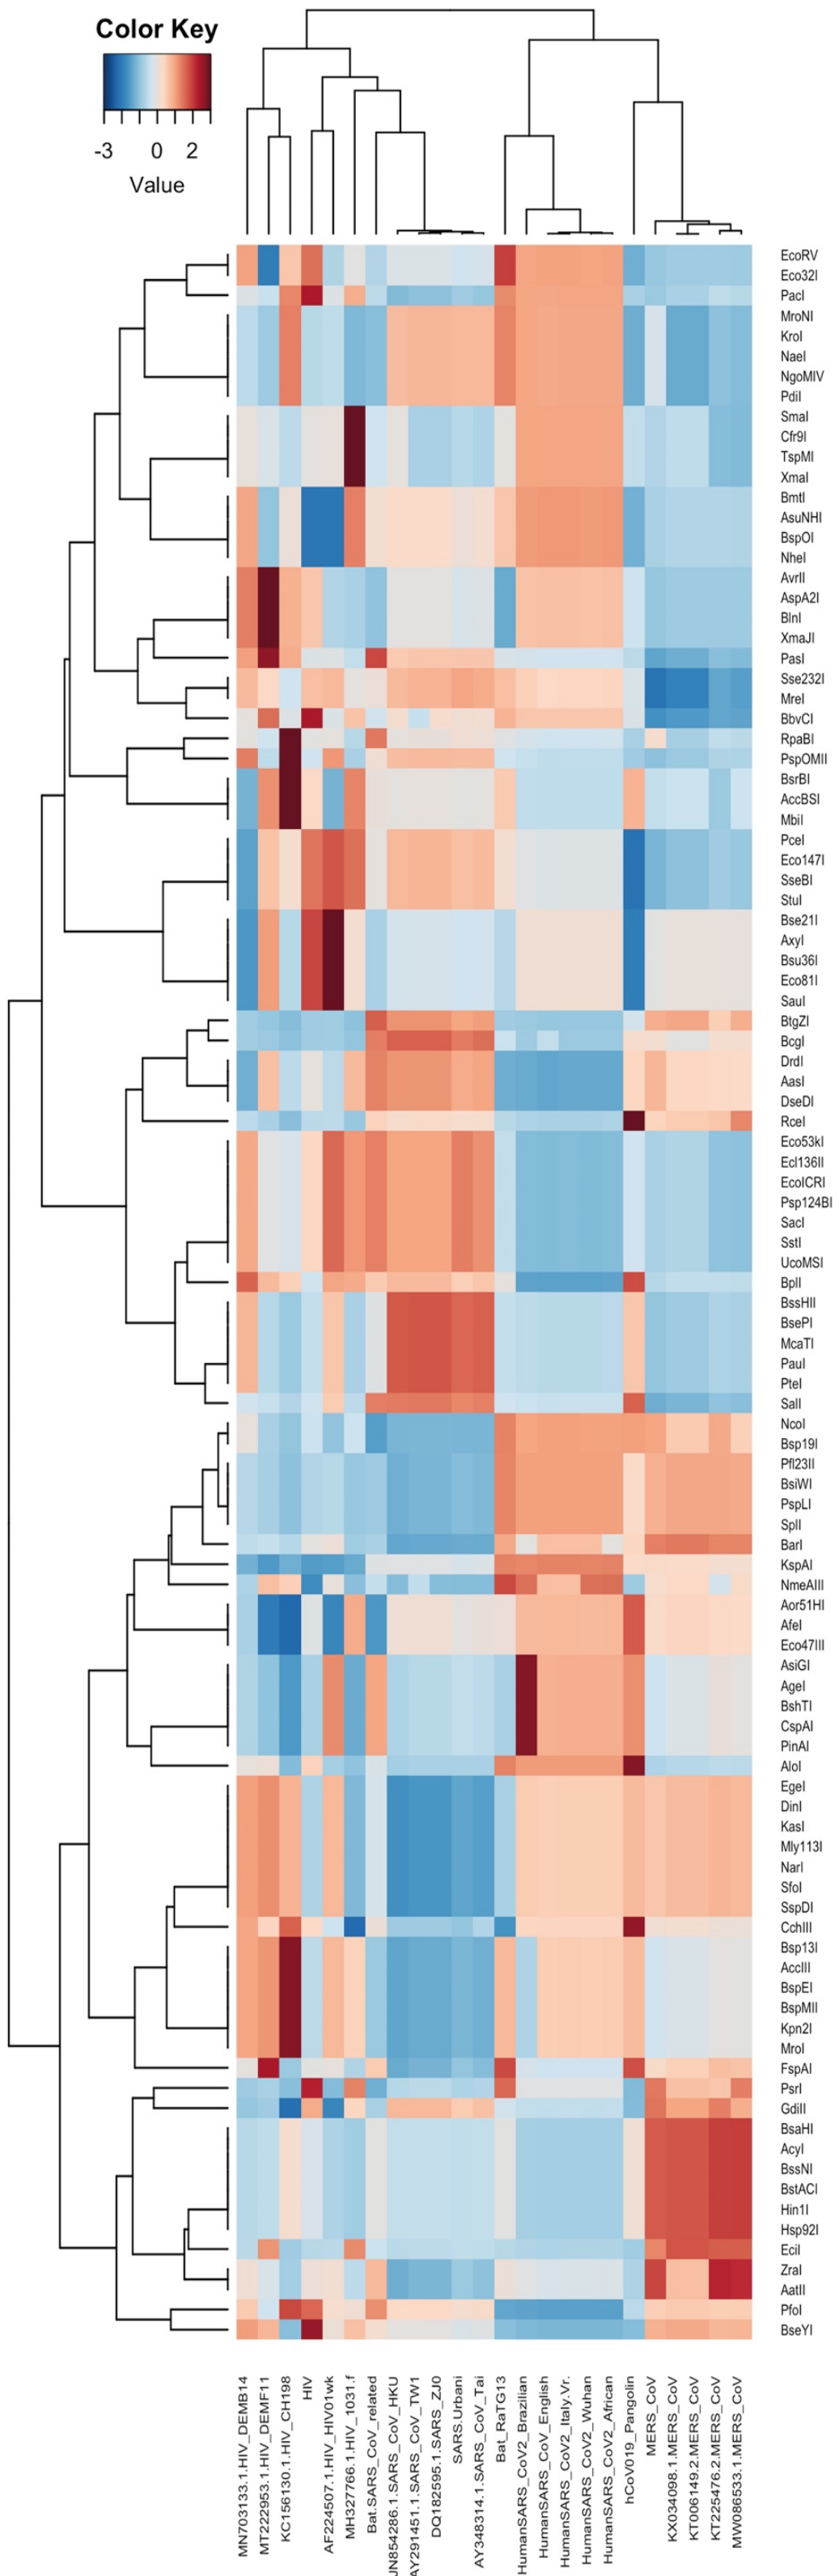

**Figure S8. Informative RSs barcode map in high resolution and full size.** This image is the same image of the Figure 2D and can be usefully to read the labels of the RSs reported on the right of the image.

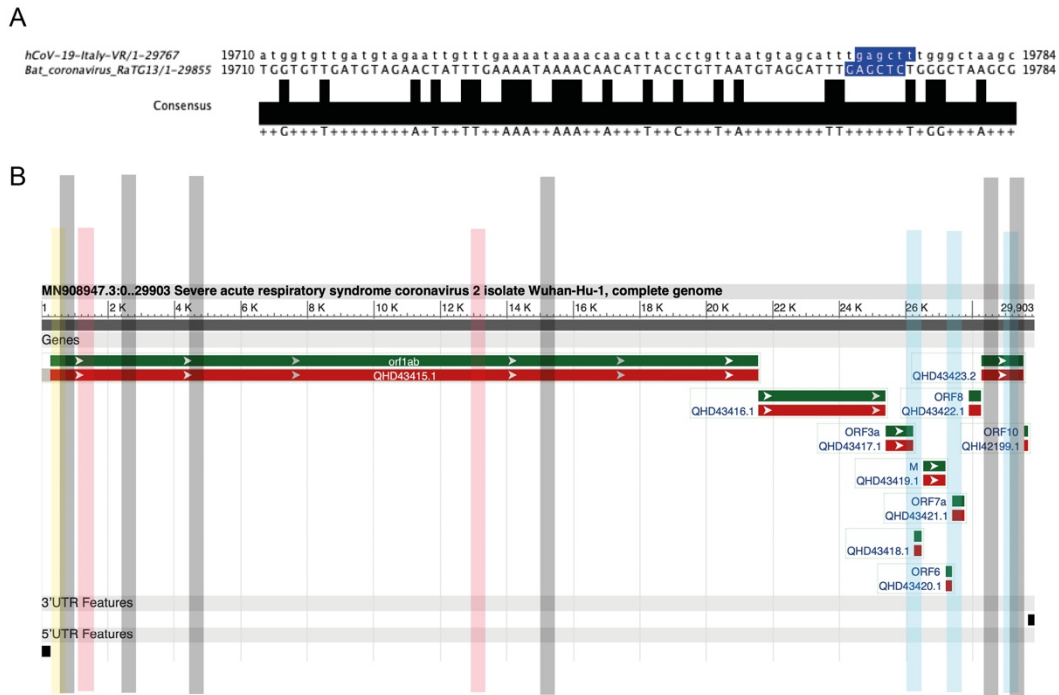

**Figure S9. Genomic organization of the SARS-CoV-2 ORFs.** The image shows the unique RSs position found in these genomes. Grey bars show position of the unique RSs of the Human SARS-CoV-2, blue bars show the shared RSs found in the last part (20000-30000bp) of the genome, the pink bars show the shared RSs in the middle region (400-20000bp) of the genome and the yellow bar show shared RS in the first part (0-400bp) of the genome.

## Supplementary Tables

### Tables S1

|                   | icSARS-C7 sequence |             |              |             |             | SARS-CoV Urbani sequence |             |              |             |            |
|-------------------|--------------------|-------------|--------------|-------------|-------------|--------------------------|-------------|--------------|-------------|------------|
|                   | GCCATAATGGC        | GCCAGCGTGGC | TGCCCAAGAGGC | GCCCTCCTGGC | GCCTACACGGC | GCCATAATGGC              | GCCAGCGTGGT | TGCCCAGGAGGC | GCATTGCTTGC | GCCTACTGTC |
| hCoV-19-Italy-Vr  | not found          | not found   | not found    | not found   | not found   | not found                | 8764        | not found    | not found   | not found  |
| Sars-CoV-19 Wuhan | not found          | not found   | not found    | not found   | not found   | not found                | 8781        | not found    | not found   | not found  |
| hCoV-19 Pangolin  | not found          | not found   | not found    | not found   | not found   | not found                | not found   | not found    | not found   | not found  |
| Bat CoV RaTG13    | not found          | not found   | not found    | not found   | not found   | not found                | not found   | not found    | not found   | not found  |

**Table S1. BglI sites in different virus genomes.** The table summarize BglI restriction sites in recombinant icSARS-C7 clone and in wild type SARS-CoV Urbani and compare these sequences in four different SARS-CoV-2 genomes.

### Tables S2

| BglI restriction sites                   |                  |                   |                |
|------------------------------------------|------------------|-------------------|----------------|
| Mutant Sars cov Urbani MA15 SHC014 spike | hCoV 19 Italy VR | Sars CoV 19 Wuhan | Bat-Cov-raTG13 |
| 12.366 bp                                | 28.944 bp        | 29.063 bp         | /              |
| 6.854 bp                                 | 823 bp           | 840 bp            | 825 bp         |
| 4.330 bp                                 |                  |                   |                |
| 3.362 bp                                 |                  |                   |                |
| 2.816 bp                                 |                  |                   |                |

**Table S2. Genomic position of the BglI restriction sites.** As expected, most of these sites are present in the mutant recombinant viruses. The only two BglI sites present hCoV-19-Italy-VR and in the SARS-CoV-19 Wuhan are located in a different genomic area compared to the recombinant viruses. The BglI site at +/-820 bp was also found in the Bat-CoV-raTG13, suggesting once again the similarity between these two viruses and a possible shared ancestor.
